1 **TITLE:**

2 **Mutation distribution density in tumors reconstructs human's lost diversity**

3

4

5 **Authors:**

6 José María Heredia-Genestar<sup>1</sup>, Tomàs Marquès-Bonet<sup>1,2,3,4</sup>, David Juan<sup>\*1</sup>, Arcadi  
7 Navarro<sup>\*1,2,3,5</sup>

8

9 1- Institute of Evolutionary Biology (CSIC-UPF), Department of Experimental and  
10 Health Sciences, Universitat Pompeu Fabra, Dr. Aiguader 88, 08003, Barcelona,  
11 Spain.

12 2- CRG-CNAG, Centre for Genomic Regulation (CRG), Barcelona Institute of Science  
13 and Technology (BIST), Baldri i Reixac 4, 08028, Barcelona, Spain.

14 3- Institució Catalana de Recerca i Estudis Avançats (ICREA), Passeig de Lluís  
15 Companys, 23, 08010, Barcelona, Spain.

16 4- Institut Català de Paleontologia Miquel Crusafont, Universitat Autònoma de  
17 Barcelona, Edifici ICTA-ICP, c/ Columnes s/n, 08193, Cerdanyola del Vallès,  
18 Barcelona, Spain

19 5- National Institute for Bioinformatics (INB), Barcelona Biomedical Research Park  
20 (PRBB), Dr. Aiguader 88, 08003, Barcelona, Spain

21 \* Corresponding authors

22

23

24

25 **Introductory Paragraph:**

26 Mutations do not accumulate uniformly across the genome. Human germline and tumor  
27 mutation density correlate poorly, and each is associated with different genomic  
28 features. Here, we analyze the genome-wide distribution of mutation densities in  
29 human and non-human Great Ape (NHGA) germlines as well as human tumors.  
30 Strikingly, non-human Great Ape germlines present higher correlation with tumors than  
31 the human germline does. This situation is mediated by a different distribution in the  
32 human germline of mutations at non-CpG sites, but not of CpG>T transitions. We  
33 propose that the impact of ancestral and historical human demographic events on  
34 human mutation density leads to this specific disruption in its expected genome-wide  
35 distribution. Tumors partially recover this distribution by the accumulation of pre-  
36 neoplastic-like somatic mutations. Our results highlight the potential utility of using  
37 Great Ape population data, rather than human controls, to establish the expected  
38 mutational background of healthy somatic cells.

39

## 40 **Introduction**

41 Mutation density, at different scales, has been shown to correlate with different  
42 genomic features, such as regional GC-content or recombination rate<sup>1-5</sup>. In cancer,  
43 mutation density has been linked to chromatin states<sup>6</sup>, with higher mutation  
44 accumulation in closed chromatin. It has been suggested that the tumor's higher  
45 mutation accumulation in closed chromatin is due to poorer accessibility or recruitment  
46 of the mismatch repair machinery to late-replicating, closed-chromatin regions<sup>7,8</sup>.  
47 Recent studies have shown that the correlation between tumor mutation density and  
48 chromatin state is highly tissue-dependent, allowing the identification of the tissue of  
49 origin of metastatic tumor samples<sup>9,10</sup>.

50

51 At a smaller scale, sequence context is a good predictor of the mutation rate<sup>11</sup>, beyond  
52 hypermutable CpG sites<sup>12-15</sup>. Sequence context has been widely used in cancer  
53 analyses to detect signatures of mutation associated with mutagens such as UV-light,  
54 tobacco smoke, or APOBEC activity<sup>16,17</sup>. These effects have also been detected in  
55 healthy somatic tissues<sup>18,19</sup>.

56

57 *De novo* mutations are also affected by sequence context<sup>20-22</sup>. The rates of some  
58 particular mutation types have changed recently across ancestries<sup>23-26</sup>. Mutation rates  
59 seem to have been under selection in the human lineage. Sequence context studies  
60 have shown differences in the relative proportion of certain mutation types between  
61 Great Ape species<sup>25</sup>. Furthermore, studies of *de novo* mutations in Great Ape samples  
62 revealed a slowdown of the overall mutation rate in humans relative to chimpanzees  
63 and gorillas<sup>27</sup>.

64

65 Here we study mutation rate evolution, through the differences in mutation distribution  
66 (at the 1Mbp scale) between human tumoral tissues and healthy populations in the  
67 Great Ape lineage.

## 68 **Results**

69

70 We compared the mutation density distribution in human (1kGP<sup>28</sup>, sgdp\_50<sup>29</sup>), non-  
71 human Great Apes (NHGA: chimpanzee<sup>30,31</sup>, gorilla<sup>30,32</sup>), and human cancer<sup>33</sup> datasets.  
72 We focused on high-quality orthologous regions shared between human, chimpanzee  
73 and gorilla genomes, measuring the number of variants per 1Mbp independently of the  
74 frequency of each variant (see Methods).

75

76 In agreement with previous reports<sup>1,3,4,6</sup>, we observe a variable distribution of the  
77 mutation density across the genome in all datasets (**Figure 1a**). Mutation densities  
78 correlate weakly between the human germline and tumors<sup>1,6</sup> (**Table 1**). Strikingly, the  
79 NHGA-tumor correlations are much stronger than the human-tumor correlation and are  
80 similar to the human-NHGA germline correlations (**Table 1 & Supplementary Table 1**).

81

82 We compared the distribution of mutation density between pairs of datasets  
83 (**Supplementary Figure 1**). Interestingly, we observed that mutation density in tumors  
84 is higher in windows where NHGAs have higher mutation density than humans  
85 (**Figures 1b,c**). To control for differences in the shapes of distributions, we ranked  
86 each set of windows according to their mutation density (**Figures 1d,e**). These ranked  
87 distributions show a clear pattern: tumor mutation densities are higher in windows with  
88 higher ranks in NHGAs than in human (two-sided Mann-Whitney U test p-value human-  
89 chimpanzee= 3.7e-216; human-gorilla = 2.8e-161). This behavior is exclusive to  
90 human-NHGA comparisons, as it cannot be observed when comparing chimpanzee to  
91 gorilla (**Supplementary Figure 1**), and can be replicated under different conditions and  
92 datasets (**Supplementary Notes, Supplementary Tables 2-6 & Supplementary**  
93 **Figure 1**).

94

95 High-diversity NHGA subspecies have stronger correlations with both human and  
96 tumor than the low-diversity subspecies (**Supplementary Table 3**). Furthermore, the  
97 diagonal pattern is only characteristic of comparisons between the germlines of  
98 humans and high-diversity NHGA subspecies. A comparison of high and low-diversity  
99 chimpanzee and gorilla subspecies showed a clear horizontal split (**Supplementary**  
100 **Figure 2**). Mutation density in tumors co-localizes with the most diverse NHGA  
101 subspecies, regardless of the mutation density in the least diverse. In other words;  
102 while a lack of diversity distorts the distribution of the genome-wide mutation densities,  
103 the diagonal pattern is caused by effects intrinsic to the human lineage. We observed a  
104 weak intermediate pattern when comparing NHGA to three archaic hominid genomes  
105 (**Supplementary Figure 1; Supplementary Note**). This suggests that at least part of  
106 the differentiation process in the distribution of mutation densities was already  
107 established before the human-Neanderthal split.

108  
109 Interestingly, correlations between a variety of genomic features and tumor mutation  
110 density are consistently more similar to the correlations with NHGAs than with humans  
111 (**Figure 2a**). Mutation densities in NHGAs have, like in humans, strong correlations  
112 with sequence conservation and recombination rate (**Supplementary Figure 3**).  
113 However, and strikingly, NHGAs show strong positive correlations with epigenomic  
114 features associated with closed chromatin, just as tumors do (**Figure 2a,**  
115 **Supplementary Table 7**). We also observe consistent associations with human  
116 chromatin states<sup>34</sup> (**Figures 2b,c**). GC-content, H3K36me1, and CpG-content show a  
117 clear positive correlation with human but negative with NHGAs and tumors, suggesting  
118 that they might be contributing to the diagonal pattern (**Figure 2d,e and 3a,b**).  
119 Interestingly, H3K36me1 has been shown to be specifically recruited in the gene  
120 bodies of genes regulated by CpG islands although its role remains unclear<sup>35</sup>.

121

122 Intrigued by the connection of several CpG-related features with the diagonal pattern  
123 that implies stronger correlation between mutation densities in tumors and NHGA than  
124 with the human germline (**Figure 3a,b**), we analyzed separately CpG>T transitions and  
125 mutations at non-CpG sites. (**Figure 3c-f**). CpG>T transitions present very strong  
126 correlations between all germline datasets and very poor correlations with tumor  
127 (**Figure 3c,d**). The relationship between CpG-content and mutation density at non-  
128 CpG sites is different in humans compared to NHGAs and tumors. Moreover, their  
129 correlations are similar to those using all sites (**Figure 3e,f**). Correcting the mutation  
130 density of CpG>T transitions by the regional CpG content homogenizes the directions  
131 of the correlations with genomic features in all datasets (**Supplementary Notes,**  
132 **Supplementary Figure 2**). Interestingly, this correlation is weaker in human than in  
133 NHGA and in tumors (**Supplementary Notes, Supplementary Table 8,**  
134 **Supplementary Figure 3**). This suggests that the differences in correlations with  
135 genomic features are caused by differences in the relative contribution of non-  
136 CpG/CpG>T mutation density in each dataset. The distribution of human *de novo*  
137 mutations<sup>36</sup> at both non-CpG and CpG sites replicates the behavior of human germline  
138 mutations showing very low correlations with tumor (**Supplementary Notes,**  
139 **Supplementary Tables 3&9**). When comparing the distribution of non-CpG mutations,  
140 we detect a horizontal pattern (**Supplementary Figure 3**) similar to those observed in  
141 comparisons of high- and low-diversity subspecies. Therefore, the combination of the  
142 behaviors of both non-CpG and CpG>T mutations causes the diagonal pattern  
143 observed when comparing all SNVs.

144

145 To explore the contribution of different mechanisms to the observed mutation densities,  
146 we analyzed their trinucleotide context. The triplet mutation spectra of human,  
147 chimpanzee, and gorilla are very similar (**Supplementary Figure 4, Supplementary**  
148 **Table 10**). It has been shown that the human mutation spectrum can be recapitulated  
149 by a combination the cancer signatures SBS1 and SBS5<sup>20,37</sup>. We were able to replicate

150 this association in NHGA and another primate species (Vervet monkey)  
151 (**Supplementary Notes, Supplementary Table 10**), suggesting its conservation in the  
152 primate lineage.

153

154 A subset of trinucleotides is significantly enriched in one of the species (Chi-Squared  
155 test p-value  $<10e-5$ ). We detected no association between these trinucleotides and

156 known mutation mechanisms (**Figure 4a, see Methods, Supplementary Note,**

157 **Supplementary Figure 4, Supplementary Table 11**). However, linear regression

158 models show a positive and significant (p-value  $<10e-4$ ) effect of the triplet's GC-

159 content and its fold-enrichment in the human-chimpanzee comparison

160 (**Supplementary Figure 4**). Only trinucleotides with similar enrichment between

161 species (non-CpG, mainly C>G and T>C) show differences in their distribution across

162 the genome between human, NHGA, and tumor (trinucleotide-difference test p-value

163  $<10e-5$ , see Methods, **Supplementary Note, Figure 4a**).

164

165

166 We compared the association of the number of mutations caused by each cancer

167 signature<sup>17,38</sup> in each individual tumor type to the human-NHGA-tumor pattern

168 (**Supplementary Table 12**). Signatures SBS5 and SBS40 showed a significant

169 association (signature-difference test p-value  $<10e-4$ , see Methods) of the pattern with

170 the tumor's signature mutation load (**Figure 4b**). Both SBS5 and SBS40 are flat

171 signatures whose mutation load is associated with the age of the sample and with pre-

172 neoplastic mutations in tumors<sup>17,38</sup> This suggests that the strong correlation between

173 NHGA and tumor mutation densities is driven by conserved mechanisms in healthy

174 cells in the Great Ape lineage, while the genome-wide distribution of mutations has

175 been altered in the human germline.

176

177

## 178 **Discussion**

179 We analyzed the mutation density distribution at the 1Mbp scale in the human and  
180 NHGA germlines, as well as in human tumors. We observed a moderate similitude  
181 between human and NHGA germlines and, surprisingly, a higher resemblance  
182 between human tumors with the germlines of NHGAs than with humans

183

184 These discrepancies in mutation density in the human and NHGA germlines are  
185 differently associated with genomic and epigenomic features. Regions more densely  
186 mutated in humans than in NHGAs tend to be GC-rich, exon-rich, promoter and  
187 enhancer-rich, open chromatin and early replicating. Particularly, CpG-related features  
188 show a positive correlation with human and a negative correlation with NHGA and  
189 tumor mutation densities. The possible functional implications in human evolution  
190 require further study.

191

192 These observations are driven by the different behavior of mutation density at CpG>T  
193 transitions (very similar in all germlines and very different in tumors) and at non-CpG  
194 sites (more similar in NHGAs and human tumors than in human germline). This is  
195 exclusive of the human germline and, thus, must have been caused by human-specific  
196 conditions.

197

198 We observed that human and other primates showed a very similar global triplet  
199 mutation spectrum. We detected an enrichment of certain trinucleotide mutations in  
200 humans and NHGAs consistent with previous results (non-CpG, GC-rich mutations are  
201 enriched in humans)<sup>25</sup>. The enriched trinucleotides are not associated with mutation  
202 signatures with known causes, nor do they contribute significantly to the higher  
203 similitude of human tumors to NHGA germlines. This suggests the absence of strong  
204 mechanistic changes biasing the accumulation of mutations in any of the studied  
205 germlines.



206

207 As previously described for human<sup>20,37</sup>, we observed that mutation rates of three non-  
208 human Primates are explained by mutation signatures SBS1 (mostly CpG>T  
209 mutations) and SBS5 (associated with “normal” accumulation of mutation in healthy  
210 somatic and germline cells<sup>16,39</sup>). Moreover, the lower human-tumor than NHGA-tumor  
211 correlation is driven by the accumulation of mutations associated with signatures SBS5  
212 and SBS40 (similar to SBS5 and recently discovered<sup>17</sup>). These results suggest that the  
213 poor human-tumor correlation is caused by the fact that human (but not NHGAs)  
214 germline (and *de novo* mutations) do not currently reflect the expected mutation  
215 densities of healthy (and pre-neoplastic-like) human somatic cells. One possible  
216 explanation of this effect, would be if the recent slowdown in mutation rates in  
217 humans<sup>27</sup> affected differently the different types of mutations.

218

219 We observed that the moderate human-NHGA and the low human-tumor correlations  
220 of mutation densities at non-CpG sites could be caused by losses in population  
221 diversity (as observed in low-diversity NHGA subspecies). We propose that successive  
222 bottlenecks during human evolution removed a substantial part of nucleotide variation  
223 that still remains to be recovered as a whole. In contrast, the hypermutability of CpG  
224 sites and its concentration in specific regions caused CpG>T transitions to have  
225 already recovered diversity levels similar to those of high-diversity NHGAs. Moreover,  
226 the recent human-exclusive population expansions<sup>30,40</sup> are expected to cause an  
227 increase of clock-like CpG>T mutations in the population<sup>41,42</sup>, leaving signatures akin to  
228 positive selection, as it has been described in Native Americans<sup>24</sup>. These effects  
229 caused a decoupling of the CpG>T/non-CpG mutation rates within the same region,  
230 stronger in humans than in NHGA and tumors. We cannot disregard an additional  
231 contribution of human-specific shifts in CpG>T transitions mutation rates, although they  
232 have been suggested to be similar across all Great Apes<sup>42</sup>. We propose that the  
233 combination of population bottlenecks and expansions, together with the specific

234 nature of the different mutation types, drives the differences observed in the  
235 distributions of human mutation densities.

236

237 Our results imply that accumulated mutations in human populations are a poor proxy of  
238 the expected mutational background in healthy somatic cells. In fact, accumulated  
239 mutations in NHGAs (at least at non-CpG sites) or even in tumors happen to be more  
240 informative about the normal occurrence of mutations in healthy somatic cells.

241

242 **Methods:**

243

244 **Datasets used:**

245 For the human datasets we used the release variant calling of 2,504 humans from the  
246 1000 Genomes Project<sup>28</sup> (1kGP), our own calling of 50 additional human samples from  
247 the Simons Genome Diversity Panel<sup>29</sup> (sgdp\_50), and *de novo* mutations from 1,548  
248 trios<sup>36</sup> that were mapped to the human reference hg19 using the liftOver tool<sup>43</sup>. We  
249 used our own mapping and calling of 69 chimpanzees and bonobos (59 chimpanzees  
250 and 10 bonobos, referred as chimpanzees in short)<sup>30,31</sup> and 43 gorillas<sup>30,32</sup>. We used  
251 the release variant calling of 3 archaic samples: Altai and Vindija 33.19  
252 Neanderthals<sup>44,45</sup>, and Denisova<sup>46</sup>. Finally, for the tumor dataset, we used the release  
253 variant calling of 2,583 human tumors from the Pan-Cancer Analysis of Whole  
254 Genomes Consortium<sup>33</sup>.

255

256 **Definition of high-quality orthologous regions shared between human,  
257 chimpanzee and gorilla genomes**

258 We mapped and called chimpanzee and bonobo, gorilla, and human (sgdp\_50)  
259 samples to the human reference hg19 using BWA MEM<sup>47</sup> and GATK<sup>48</sup> following the  
260 best practices protocols<sup>49,50</sup> and additional quality filters (**Supplementary Notes**).

261

262 To avoid mis-mappings to the human reference and erroneous estimates of mutation  
263 density in the NHGA samples (too low density caused by lack of mapping reads or  
264 deletions or too high density caused by collapsed duplications<sup>51</sup>) we filtered out any  
265 region of the human reference genome hg19 failing one of the following criteria: poor  
266 mappability of the human reference split into 35bp k-mers, poor callability in  $\geq 25\%$  of  
267 the chimpanzee or gorilla samples, or, matching a known Copy Number Variable  
268 region in NHGA samples<sup>52</sup> (**Supplementary Notes**). 2,052Mbp of autosomal sequence  
269 passed this filtering (76.54% of the non-N human reference autosomes). We divided

270 the autosomes into 1Mbp overlapping (500kb) windows and kept all windows where  
271  $\geq 50\%$  of its bases passed our filtering. This left 5,040 1Mbp windows to analyze  
272 (**Supplementary Figure 1, Supplementary Table 2**).

273

274 These filters were applied to all datasets used, including both our callings and external  
275 datasets used as released. All SNV counts, trinucleotide counts, and genomic features  
276 measurements through this study used only regions passing this filtering. For the  
277 analysis of archaic samples, we combined this filtering with the intersection of the  
278 callability mask of all 3 archaic samples. This specific filtering was applied to all  
279 datasets when compared with the archaic samples.

280

281

#### 282 **Mutation density:**

283 We measured mutation density of each window in each dataset by counting either the  
284 number of non-fixed segregating sites (in the human, chimpanzee and gorilla datasets)  
285 or the number of somatic mutations (in the tumor and human *de novo* datasets,  
286 accounting repeated mutations as independent mutational events). We divided this  
287 count of Single Nucleotide Variants (SNV) by the fraction of the window passing our  
288 filtering. This results in a measure of mutations per Megabasepair (Mbp) of sequence  
289 for each window. We standardized the resulting distribution within each dataset  
290 deeming it as the mutation density. We ranked all windows within a dataset by their  
291 distribution of mutation density to control for the different shapes of the datasets  
292 distributions.

293

#### 294 **Correlations between distributions:**

295 All correlations used in this analysis are Pearson's correlation (using the R function  
296 `cor.test`) between the standardized mutation densities (unranked) of the two datasets

297 unless otherwise specified. Partial correlations, when used, were calculated using the  
298 pcor function from the ppcor R package.

299

### 300 **Significance of the diagonal split:**

301 To measure the significance of the diagonal split pattern observed when comparing the  
302 human and NHGA datasets, we divided all windows into two groups depending on if  
303 the ranked mutation density is higher in human than NHGAs or vice-versa. We  
304 calculated the two-sided Mann-Whitney U test on the variable of interest (usually, the  
305 tumor mutation density) on both groups using the R function wilcox.test.

306

### 307 **Genomic Features:**

308 The genomic features used were filtered using the same mappability, callability and  
309 copy-number filters used for the mutation density data. The features used were either  
310 the overlap of the feature's genomic coordinates with the fraction of the 1Mbp window  
311 passing our filtering (e.g. GC-content, CpG-content), or the average value or intensity  
312 of the feature in the passing fraction of the window (e.g. histone marks), depending on  
313 the original data (**Supplementary Table 7**).

314

### 315 **Trinucleotides:**

316 We classified each SNV into the 96 possible combinations of trinucleotides (12  
317 different mutation types, by 16 combinations of the adjacent nucleotides, divided by  
318 two when folding them). We determined the adjacent reference sequence of each SNV  
319 using the getfasta option of bedtools<sup>53</sup>. We filtered out any variant where the liftOver  
320 tool<sup>43</sup> could not map them to the chimpanzee panTro5 or the gorilla gorGor5 reference  
321 genomes, or the trinucleotide sequence differed in one of the three reference  
322 genomes. This filter was applied to all windows and we used for our analysis only  
323 windows where  $\geq 50\%$  of it passed both the original high-quality orthologous regions  
324 and this 3-reference filter, leaving 4,920 windows to use. We applied additional filters

325 requiring the trinucleotide to be species-exclusive and to not overlap variants in other  
326 species (**Supplementary Note**). This resulted in a high-confidence set of species-  
327 exclusive trinucleotides where the ancestral and derived alleles could be reliably  
328 inferred. This filtering affected more CpG>T than non-CpG sites, due to the recurrent  
329 nature of CpG>T transitions (**Supplementary Table 10**).

330

### 331 **Mutation spectra:**

332 We calculated each species' mutation spectra as the fraction of all trinucleotides in a  
333 dataset belonging to one of the 96 trinucleotides. We calculated correlations between  
334 datasets using Pearson's correlation (`cor.test` function in R). We measured the  
335 correlation of the mutation spectrum of each species and the combined effect of cancer  
336 mutation signatures SBS1 and SBS5<sup>17,38</sup> by the formula:  $0.1 \cdot \text{SBS1} + 0.9 \cdot \text{SBS5}$ , as  
337 CpG>T transitions are the main components of signature SBS1 and they represent  
338 ~10% of the trinucleotides in both the human and NHGA datasets.

339

### 340 **Whole-genome enrichment of trinucleotides:**

341 We calculated the enrichment and its significance in each germline dataset pair  
342 (human-chimpanzee, human-gorilla, chimpanzee-gorilla) using the method described  
343 in Harris, 2017<sup>25</sup>. We calculated the enrichment of trinucleotide T between species A  
344 and B by dividing *fraction of T in species A / fraction of T in species B*. We calculated a  
345 chi-squared test using a contingency table with: the trinucleotide count in species A, in  
346 species B, the count of the rest of trinucleotides in species A, and in species B. As the  
347 counts of trinucleotides are not independent from each other, we sorted all  
348 trinucleotides from most to least significant, and rerun the test by decreasing  
349 significance order, while removing the previously used trinucleotides from the count of  
350 total trinucleotides.

351

352 CpG>T transitions are highly affected by the sample size of the datasets. We ran all  
353 the tests using both 1kGP and sgdp\_50 as the human dataset. We detected  
354 incoherences on the significance and direction of the results in two CpG>T  
355 trinucleotides. We report the results using 1kGP where tests using both 1kGP and  
356 sgdp\_50 are coherent in both significance and direction of the enrichment.  
357 The top 10% most enriched trinucleotides in each species pairwise comparison were  
358 compared with cancer mutation signatures<sup>38</sup>, and reported when the trinucleotide  
359 represented  $\geq 5\%$  of the mutations within a signature.

360

#### 361 **Trinucleotide distribution difference test (trinucleotide-difference test):**

362 We developed a method to determine which trinucleotides contribute significantly to the  
363 difference between NHGAs-tumors and human-tumors mutation density correlations:  
364 For each trinucleotide T and each pair of species (human-chimpanzee, human-gorilla,  
365 and, chimpanzee-gorilla) we, subtract the ranked mutation density of T in species A  
366 minus the ranking in tumor, and in species B minus tumor. We calculate the two-sided  
367 Kolmogorov-Smirnov test (using the R function ks.test) of the two resulting  
368 distributions. We use the p-value of the ks-test as the significance of the test and the  
369 difference between the standard deviation of both distributions (as both have a mean of  
370 0) as the test's effect size. The results when using 1kGP or sgdp\_50 as the human  
371 datasets are concordant in the direction of the association, but we discarded the  
372 sgdp\_50 results because the smaller number of SNV (and of each trinucleotide type)  
373 results in lower power when using sgdp\_50.

374

#### 375 **Association of GC-content in the trinucleotide sequence:**

376 We counted the number of Cytosine and Guanine bases in each trinucleotide and built  
377 a linear regression (using the R function glm). The GC-content of the triplet acted as a  
378 predictor of the result of the test (the log<sub>10</sub> fold-enrichment in the whole-genome

379 enrichment analysis or the difference between the standard deviation of both  
380 distributions in the trinucleotide-difference test).

381

382 **Mutation load-difference test per mutation signature (signature-difference test):**

383 In order to determine the contribution of each mutation signature to the difference  
384 between NHGAs-tumors and human-tumors mutation density correlations, we rerun  
385 the trinucleotide-difference test using the 1kGP and chimpanzee datasets, while using  
386 the different individual tumor types (**Supplementary Table 12**). For each trinucleotide,  
387 tumor type and mutation signature, we built a linear regression (using R's glm function)  
388 where the mutation load of that signature in that tumor type<sup>17</sup> predicted the effect size  
389 in the trinucleotide-difference test for that tumor type (**Supplementary Note**). For each  
390 signature, we built a contingency table where all 96 trinucleotides were classified by  
391 whether being significant or not (p-value <0.05) in the trinucleotide-difference test, and  
392 the significance of the mutation load in the linear regression model. We ran a chi-  
393 squared test on that contingency table and obtained its significance.



394 **Acknowledgements:**

395 We thank B. Lehner, D. Weghorn, and I. Lobón for their insights discussing the  
396 analyses, and C. Warembourg for her statistical analysis help. J.M.H.G is supported by  
397 MDM-2014-0370. T.M.B. is supported by BFU2017-86471-P (MINECO/FEDER, UE),  
398 U01 MH106874 grant, Howard Hughes International Early Career, Obra Social "La  
399 Caixa" and Secretaria d'Universitats i Recerca and CERCA Programme del  
400 Departament d'Economia i Coneixement de la Generalitat de Catalunya (GRC 2017  
401 SGR 880). D.J. is supported by Juan de la Cierva fellowship (FJCI-2016-29558) from  
402 MICINN. A.N. is supported by AEI-PGC2018-101927-BI00(FEDER/UE), MINECO-  
403 BFU2015-68649-P (MINECO/FEDER, UE), the Spanish National Institute of  
404 Bioinformatics of the Instituto de Salud Carlos III (PT17/0009/0020), and by FEDER  
405 (Fondo Europeo de Desarrollo Regional)/FSE (Fondo Social Europeo).

406

407 **Author Contributions:**

408 J.M.H.G. performed all the analysis. J.M.H.G and D.J wrote the manuscript. T.M.B.,  
409 D.J. and A.N. conceived and supervised this work. All the authors read and approved  
410 the final manuscript.

411

412 **Competing interests statement:**

413 All authors declare no competing interests

414

415 **Data availability statement:**

416 No new data was generated for this study. All the analyses were performed using  
417 publicly available data obtained from their original publications, as referenced.

418

## 419 References

- 420 1. Hodgkinson, A., Chen, Y. & Eyre-Walker, A. The large-scale distribution of  
421 somatic mutations in cancer genomes. *Hum. Mutat.* **33**, 136–143 (2012).
- 422 2. Tyekucheva, S. *et al.* Human-macaque comparisons illuminate variation in  
423 neutral substitution rates. *Genome Biol.* **9**, R76 (2008).
- 424 3. Ananda, G., Chiaromonte, F. & Makova, K. D. A genome-wide view of mutation  
425 rate co-variation using multivariate analyses. *Genome Biol.* **12**, R27 (2011).
- 426 4. Hodgkinson, A. & Eyre-Walker, A. Variation in the mutation rate across  
427 mammalian genomes. *Nat. Rev. Genet.* **12**, 756–766 (2011).
- 428 5. Makova, K. D. & Hardison, R. C. The effects of chromatin organization on  
429 variation in mutation rates in the genome. *Nat. Rev. Genet.* **16**, 213–223 (2015).
- 430 6. Schuster-Böckler, B. & Lehner, B. Chromatin organization is a major influence  
431 on regional mutation rates in human cancer cells. *Nature* **488**, 504–507 (2012).
- 432 7. Supek, F. & Lehner, B. Differential DNA mismatch repair underlies mutation rate  
433 variation across the human genome. *Nature* **521**, 81–84 (2015).
- 434 8. Supek, F. & Lehner, B. Scales and mechanisms of somatic mutation rate  
435 variation across the human genome. *DNA Repair (Amst)*. 102647 (2019).  
436 doi:10.1016/j.dnarep.2019.102647
- 437 9. Polak, P. *et al.* Cell-of-origin chromatin organization shapes the mutational  
438 landscape of cancer. *Nature* **518**, 360–364 (2015).
- 439 10. Kübler, K. *et al.* Tumor mutational landscape is a record of the pre-malignant  
440 state. *bioRxiv* 517565 (2019). doi:10.1101/517565
- 441 11. Aggarwala, V. & Voight, B. F. An expanded sequence context model broadly  
442 explains variability in polymorphism levels across the human genome. *Nat.*  
443 *Genet.* **48**, 349–55 (2016).
- 444 12. Hwang, D. G. & Green, P. Bayesian Markov chain Monte Carlo sequence

- 445 analysis reveals varying neutral substitution patterns in mammalian evolution.  
446 *Proc. Natl. Acad. Sci. U. S. A.* **101**, 13994–4001 (2004).
- 447 13. Keightley, P. D., Eöry, L., Halligan, D. L. & Kirkpatrick, M. Inference of Mutation  
448 Parameters and Selective Constraint in Mammalian Coding Sequences by  
449 Approximate Bayesian Computation. *Genetics* **187**, 1153–1161 (2011).
- 450 14. Siepel, A. & Haussler, D. Phylogenetic Estimation of Context-Dependent  
451 Substitution Rates by Maximum Likelihood. *Mol. Biol. Evol.* **21**, 468–488 (2003).
- 452 15. Nachman, M. W. & Crowell, S. L. Estimate of the mutation rate per nucleotide in  
453 humans. *Genetics* **156**, 297–304 (2000).
- 454 16. Alexandrov, L. B. *et al.* Signatures of mutational processes in human cancer.  
455 *Nature* **500**, 415–421 (2013).
- 456 17. Alexandrov, L. *et al.* The Repertoire of Mutational Signatures in Human Cancer.  
457 *bioRxiv* 322859 (2018). doi:10.1101/322859
- 458 18. Martincorena, I. *et al.* Tumor evolution. High burden and pervasive positive  
459 selection of somatic mutations in normal human skin. *Science* **348**, 880–6  
460 (2015).
- 461 19. Martincorena, I. *et al.* Somatic mutant clones colonize the human esophagus  
462 with age. *Science* **362**, 911–917 (2018).
- 463 20. Rahbari, R. *et al.* Timing, rates and spectra of human germline mutation. *Nat.*  
464 *Genet.* **48**, 126–133 (2016).
- 465 21. Smith, T. C. A., Arndt, P. F. & Eyre-Walker, A. Large scale variation in the rate of  
466 germ-line de novo mutation, base composition, divergence and diversity in  
467 humans. *PLOS Genet.* **14**, e1007254 (2018).
- 468 22. Carlson, J. *et al.* Extremely rare variants reveal patterns of germline mutation  
469 rate heterogeneity in humans. *Nat. Commun.* **9**, 3753 (2018).
- 470 23. Harris, K. Evidence for recent, population-specific evolution of the human  
471 mutation rate. *Proc. Natl. Acad. Sci. U. S. A.* **112**, 3439–44 (2015).
- 472 24. Mathieson, I. & Reich, D. Differences in the rare variant spectrum among human

- 473 populations. *PLOS Genet.* **13**, e1006581 (2017).
- 474 25. Harris, K. & Pritchard, J. K. Rapid evolution of the human mutation spectrum.  
475 *Elife* **6**, (2017).
- 476 26. Narasimhan, V. M. *et al.* Estimating the human mutation rate from autozygous  
477 segments reveals population differences in human mutational processes. *Nat.*  
478 *Commun.* **8**, 303 (2017).
- 479 27. Besenbacher, S., Hvilsom, C., Marques-Bonet, T., Mailund, T. & Schierup, M. H.  
480 Direct estimation of mutations in great apes reconciles phylogenetic dating. *Nat.*  
481 *Ecol. Evol.* **3**, 286–292 (2019).
- 482 28. The 1000 Genomes Project Consortium. A global reference for human genetic  
483 variation. *Nature* **526**, 68–74 (2015).
- 484 29. Mallick, S. *et al.* The Simons Genome Diversity Project: 300 genomes from 142  
485 diverse populations. *Nature* **538**, (2016).
- 486 30. Prado-Martinez, J. *et al.* Great ape genetic diversity and population history.  
487 *Nature* **499**, 471–5 (2013).
- 488 31. de Manuel, M. *et al.* Chimpanzee genomic diversity reveals ancient admixture  
489 with bonobos. *Science* **354**, 477–481 (2016).
- 490 32. Xue, Y. *et al.* Mountain gorilla genomes reveal the impact of long-term  
491 population decline and inbreeding. *Science (80- )*. **348**, 242–245 (2015).
- 492 33. The ICGC/TCGA Pan-Cancer Analysis of Whole Genomes Network. Pan-cancer  
493 analysis of whole genomes. *Prep.* (2019).
- 494 34. Ernst, J. *et al.* Mapping and analysis of chromatin state dynamics in nine human  
495 cell types. *Nature* **473**, 43–49 (2011).
- 496 35. Vavouri, T. & Lehner, B. Human genes with CpG island promoters have a  
497 distinct transcription-associated chromatin organization. *Genome Biol.* **13**, R110  
498 (2012).
- 499 36. Jónsson, H. *et al.* Parental influence on human germline de novo mutations in  
500 1,548 trios from Iceland. *Nature* **549**, 519–522 (2017).

- 501 37. Alexandrov, L. B. *et al.* Clock-like mutational processes in human somatic cells.  
502 *Nat. Genet.* **47**, 1402–1407 (2015).
- 503 38. Tate, J. G. *et al.* COSMIC: the Catalogue Of Somatic Mutations In Cancer.  
504 *Nucleic Acids Res.* **47**, D941–D947 (2019).
- 505 39. Blokzijl, F. *et al.* Tissue-specific mutation accumulation in human adult stem  
506 cells during life. *Nature* **538**, 260–264 (2016).
- 507 40. Li, H. & Durbin, R. Inference of human population history from individual whole-  
508 genome sequences. *Nature* **475**, 493–496 (2011).
- 509 41. Harpak, A., Bhaskar, A. & Pritchard, J. K. Mutation Rate Variation is a Primary  
510 Determinant of the Distribution of Allele Frequencies in Humans. *PLoS Genet.*  
511 **12**, e1006489 (2016).
- 512 42. Moorjani, P., Amorim, C. E. G., Arndt, P. F. & Przeworski, M. Variation in the  
513 molecular clock of primates. *Proc. Natl. Acad. Sci.* **113**, 10607–10612 (2016).
- 514 43. Hinrichs, A. S. *et al.* The UCSC Genome Browser Database: update 2006.  
515 *Nucleic Acids Res.* **34**, D590-8 (2006).
- 516 44. Prüfer, K. *et al.* The complete genome sequence of a Neanderthal from the Altai  
517 Mountains. *Nature* **505**, 43–9 (2014).
- 518 45. Prüfer, K. *et al.* A high-coverage Neandertal genome from Vindija Cave in  
519 Croatia. *Science* **358**, 655–658 (2017).
- 520 46. Meyer, M. *et al.* A high-coverage genome sequence from an archaic Denisovan  
521 individual. *Science* **338**, 222–6 (2012).
- 522 47. Li, H. Aligning sequence reads, clone sequences and assembly contigs with  
523 BWA-MEM. (2013).
- 524 48. McKenna, A. *et al.* The Genome Analysis Toolkit: A MapReduce framework for  
525 analyzing next-generation DNA sequencing data. *Genome Res.* **20**, 1297–1303  
526 (2010).
- 527 49. DePristo, M. A. *et al.* A framework for variation discovery and genotyping using  
528 next-generation DNA sequencing data. *Nat. Genet.* **43**, 491–498 (2011).

- 529 50. Van der Auwera, G. A. *et al.* From FastQ data to high confidence variant calls:  
530 the Genome Analysis Toolkit best practices pipeline. *Curr. Protoc. Bioinforma.*  
531 **43**, 11.10.1-33 (2013).
- 532 51. Hartasánchez, D. A., Brasó-Vives, M., Heredia-Genestar, J. M., Pybus, M. &  
533 Navarro, A. Effect of Collapsed Duplications on Diversity Estimates: What to  
534 Expect. *Genome Biol. Evol.* **10**, 2899–2905 (2018).
- 535 52. Sudmant, P. H. *et al.* Evolution and diversity of copy number variation in the  
536 great ape lineage. *Genome Res.* **23**, 1373–82 (2013).
- 537 53. Quinlan, A. R. & Hall, I. M. BEDTools: a flexible suite of utilities for comparing  
538 genomic features. *Bioinformatics* **26**, 841–842 (2010).
- 539 54. Barski, A. *et al.* High-Resolution Profiling of Histone Methylations in the Human  
540 Genome. *Cell* **129**, 823–837 (2007).
- 541
- 542
- 543

544 **Figure legends:**

545 **Figure 1:** Distribution of mutation density across datasets. **a)** Distribution of the  
546 standardized mutation density in 1Mbp windows in human, NHGA, and tumor datasets.  
547 The numbers next to the legend represent the fold-enrichment between the 95<sup>th</sup> and 5<sup>th</sup>  
548 quantiles. **b)** Distribution of the standardized mutation density in humans, chimpanzee  
549 and tumor. Each point represents a 1Mbp window. The x-axis represents the human  
550 mutation density, the y-axis the chimpanzee mutation density, and the point color, the  
551 tumor mutation density. The black line represents the diagonal where the mutation  
552 density is equal in human and chimpanzee. **c)** Same as b but comparing human and  
553 gorilla. **d)** Distribution of the ranked mutation density in humans, chimpanzee and  
554 tumor. Each point represents a 1Mbp window. The x and y axis represent the ranking  
555 in mutation density in human and chimpanzee, respectively. Color of points represents  
556 the ranked mutation density in the tumor dataset. The solid black line represents the  
557 diagonal where the ranked mutation density is equal in human and chimpanzee. The  
558 dashed lines represent 25% difference in ranking in both species. **e)** Same as d,  
559 comparing human and gorilla.

560

Figure 1

Distribution of mutations

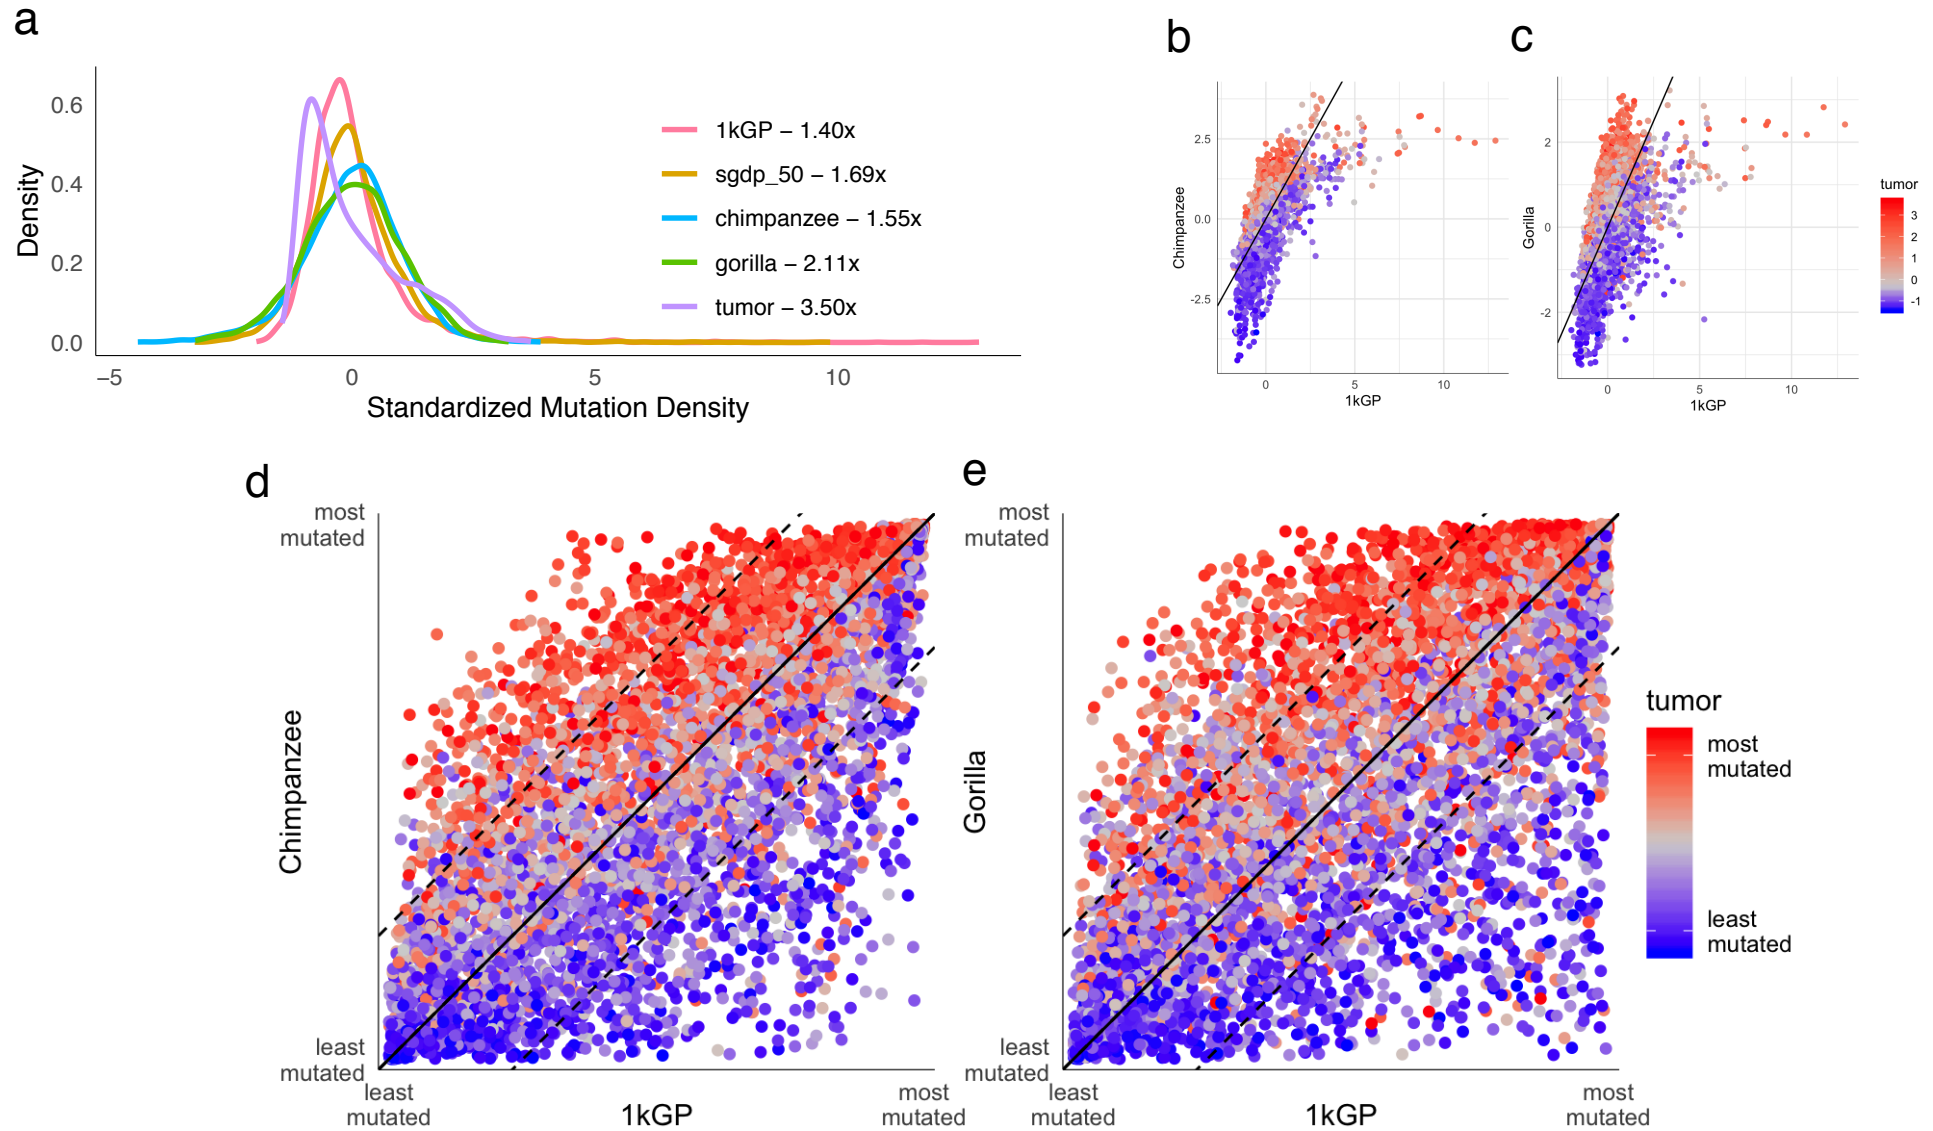



561 **Figure 2:** Genomic Features. **a)** Pearson's correlation R of different datasets with  
562 human genomic features (**Supplementary Table 7**). **b)** Overlap of heterochromatin in  
563 human lymphoblastoid cell lines (LCLs) measured by chromHMM states<sup>34</sup> compared  
564 with the human and chimpanzee ranked mutation density distribution. **c)** Same as b but  
565 using the aggregate chromHMM states associated with the presence of promoters. **d)**  
566 same as b and c but color denotes the window's GC-content, **e)** density of H3K36me1  
567 histone mark ChIP-seq reads<sup>54</sup>.

568

**a** Figure 2

Correlation with genomic features

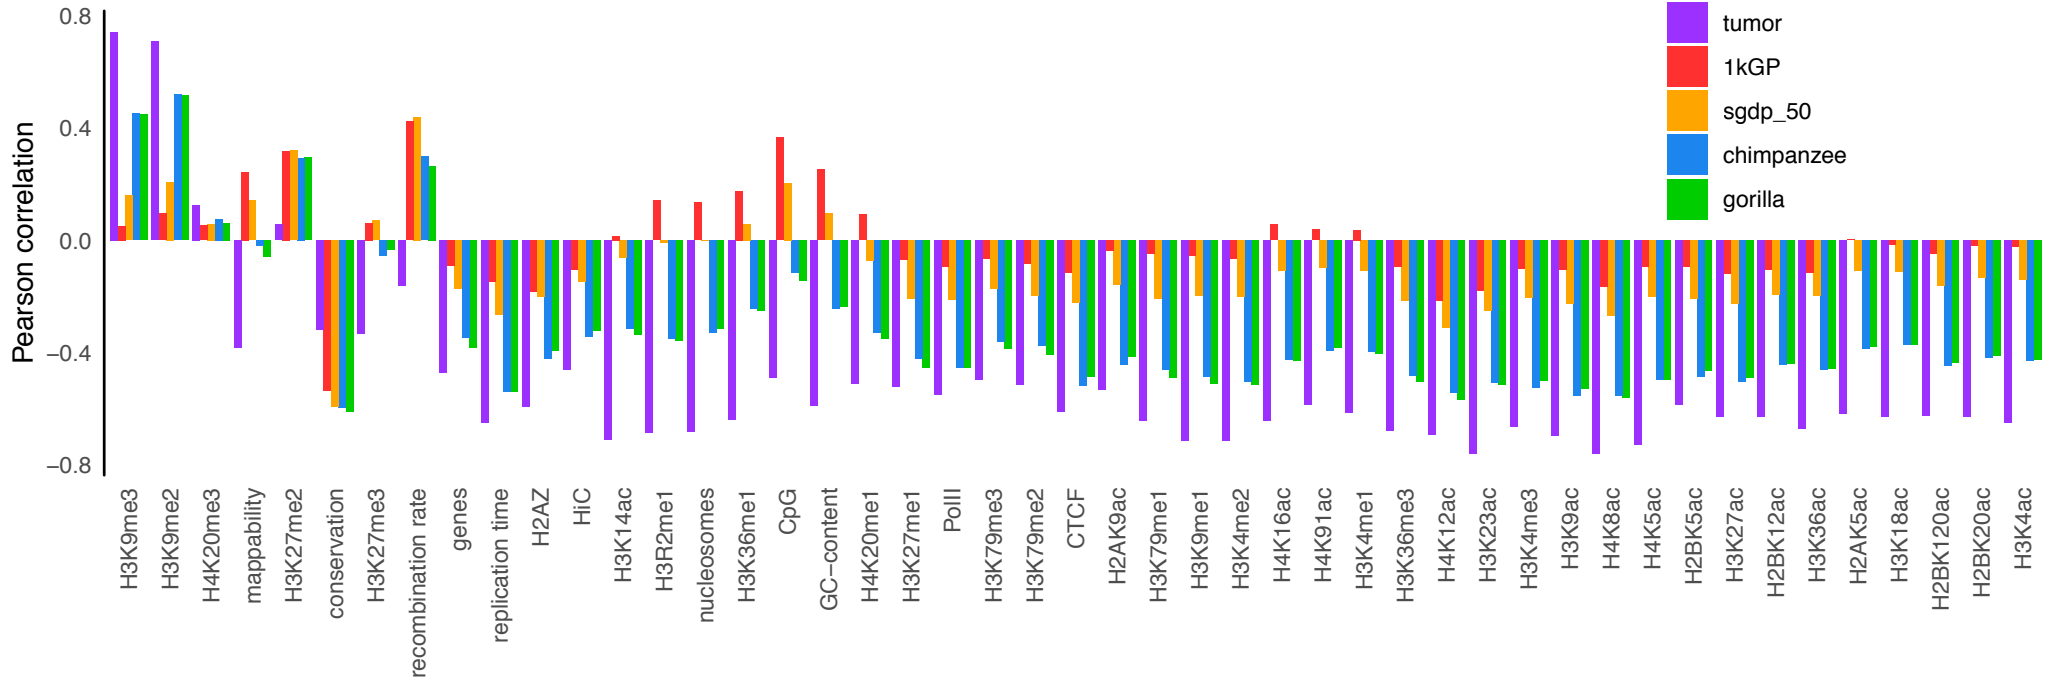

**b**

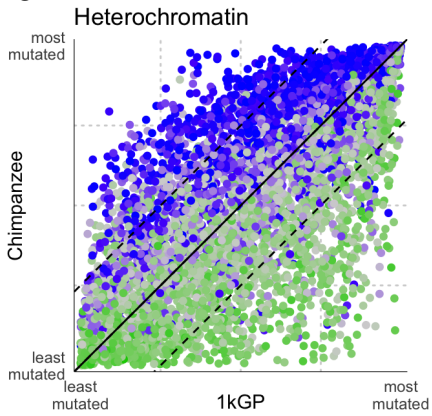

**c**

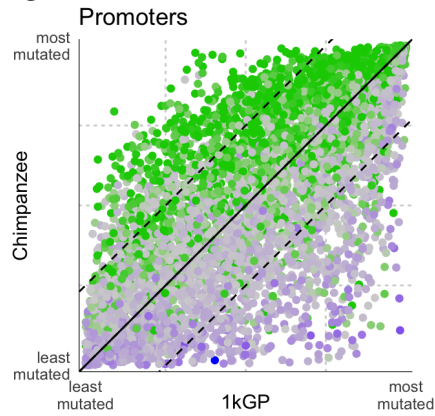

**d**

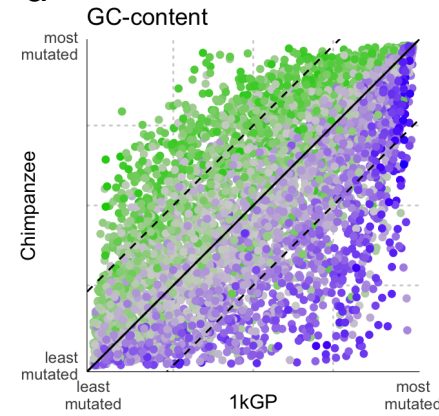

**e**

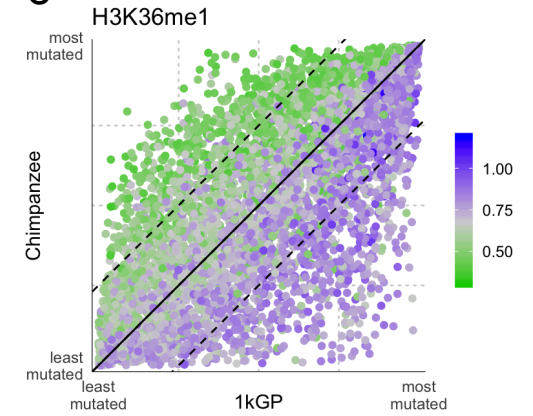

569 **Figure 3: CpG-content. a)** Distribution of the CpG-content in the human reference  
570 hg19 compared with the ranked mutation density in human and chimpanzee, **b)** loess  
571 smoothers of mutation density rank and CpG-content for the different datasets. **c)**  
572 CpG>T transitions corrected by the whole window size; loess smoothers same as in b;  
573 **d)** correlation of the standardized mutation density of CpG>T transitions in different  
574 species; **e)** same as in b,c, but using only mutations at non-CpG sites; **f)** correlation of  
575 the standardized mutation density of mutations at non-CpG sites in different species.  
576

Figure 3

Association with CpG sites

a

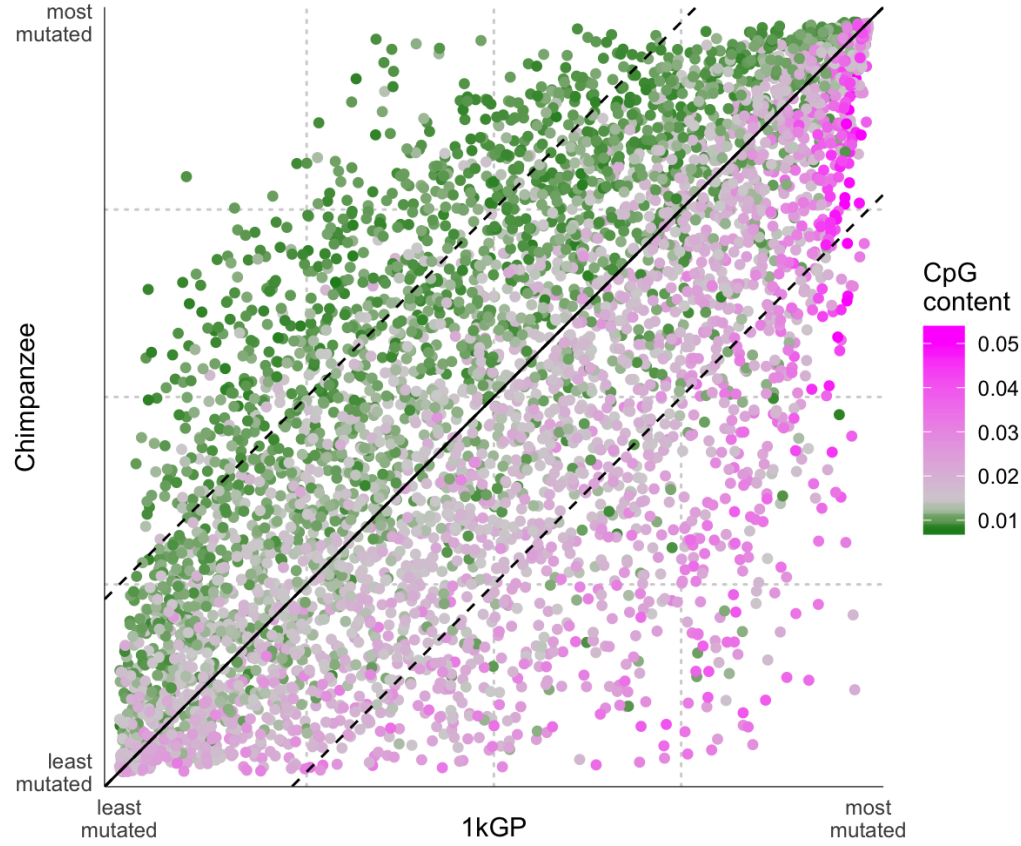

b

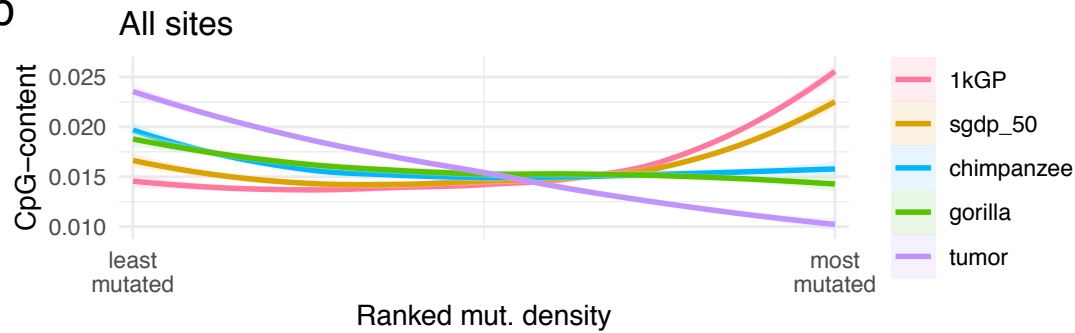

c

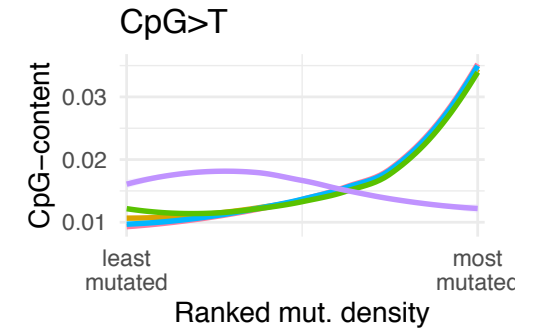

d

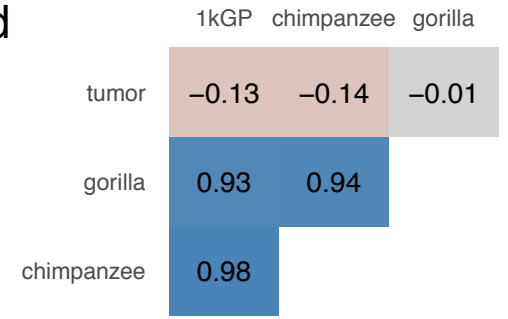

e

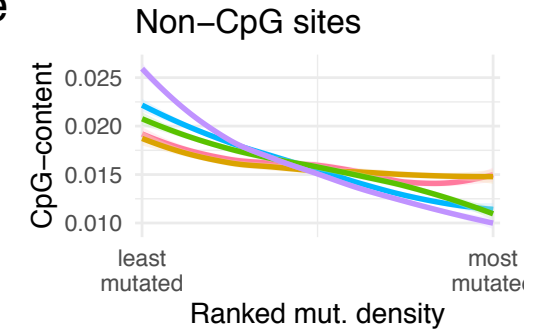

f

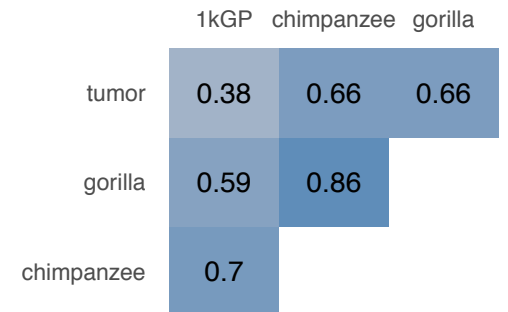

577 **Figure 4:** Trinucleotide analysis. **a)** Contribution to the higher chimpanzee-tumors  
578 mutation distribution similarity Vs. genome-wide enrichment in human compared to  
579 chimpanzee. X-axis: log<sub>10</sub> of the enrichment of trinucleotides comparing human and  
580 chimpanzee. Left: enriched in chimpanzee; right: enriched in human. Y-axis: effect size  
581 (difference between the standard deviations of human-tumor and chimpanzee-tumor)  
582 of the trinucleotide-difference test (see Methods). Positive values: tumor distribution  
583 more similar to chimpanzee; negative values: tumor distribution more similar to human.  
584 Color represents the central nucleotide mutation type. Filled dots represent mutation  
585 types significant (p-value <1e-5) in the trinucleotide-difference test. **b)** -Log<sub>10</sub> p-values  
586 of the association of each cancer signature mutation load to the trinucleotide-difference  
587 test (signature-difference test; see Methods). Color represents the number of mutations  
588 associated with each signature in the whole dataset. Dot size represents the number of  
589 tumor types with two or more samples showing the signature. Only non-artifact  
590 signatures present in 2 or more tumor types are shown.  
591

Figure 4

Analysis of trinucleotide mutations

a

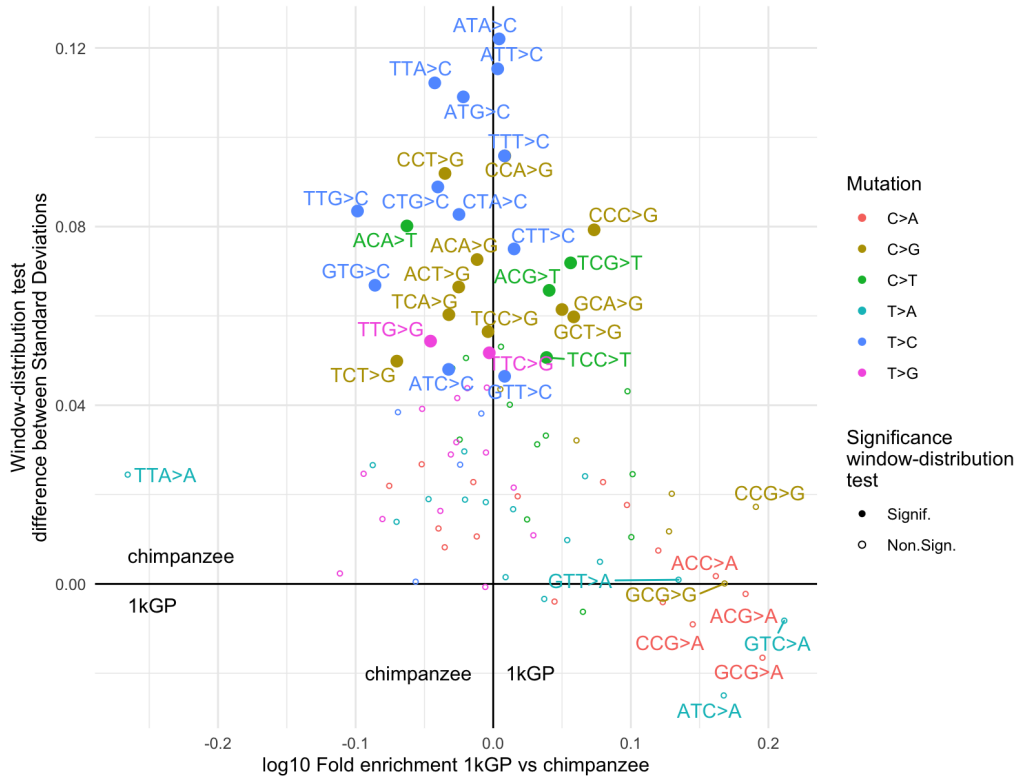

b

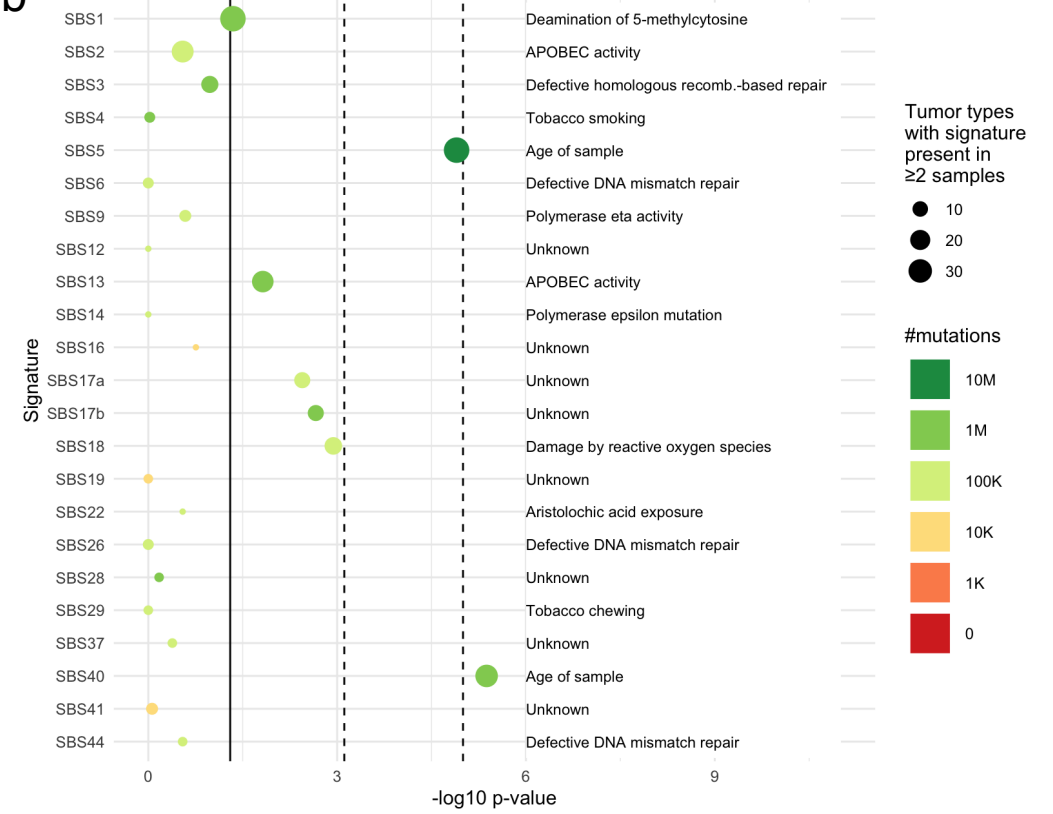

592 **Table legends:**

593

594 **Table 1:** Correlations. Pairwise Pearson's correlation R of the standardized mutation  
595 density of 5,040 1Mbp windows between datasets.

596

Correlation between distributions of mutation density

|                   | <b>1kGP</b> | <b>Chimpanzee</b> | <b>Gorilla</b> |
|-------------------|-------------|-------------------|----------------|
| <b>Chimpanzee</b> | 0.65        | -                 | -              |
| <b>Gorilla</b>    | 0.53        | 0.84              | -              |
| <b>Tumor</b>      | 0.16        | 0.55              | 0.58           |

597
